# Supplementary material
Source: Springer Nature journal article supplement (https://www.springermedizin.de/resource/supplementary/12931_2010_1038_MOESM9_ESM.pdf/9425426)

BAL Albumin ( $\mu\text{g/ml}$ )

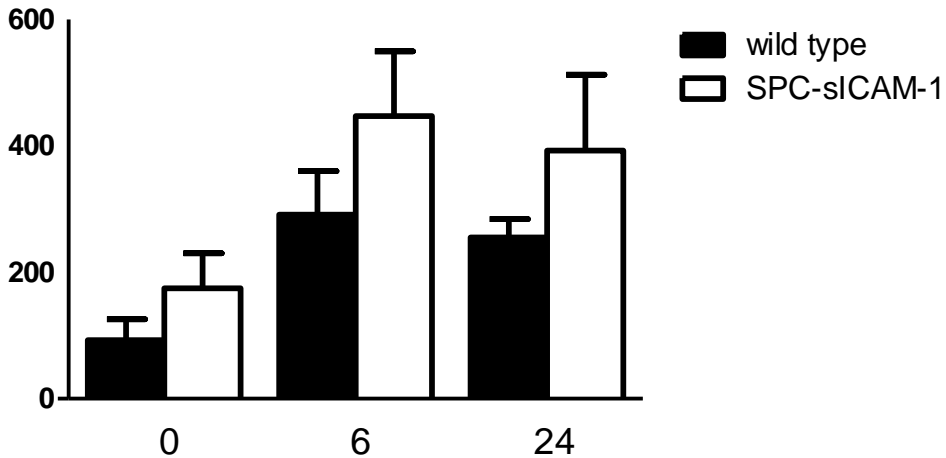

Supplement: MOESM9 [file 9425426]
